# Supplementary material for: A dynamic gas extraction-assisted paper-based method for colorimetric determination of bromides
Source: Royal Society of Chemistry journal article supplement (doi:10.1039/c9ay02640a), 2020-01-01
Supplement: c9ay02640a1.pdf [file c9ay02640a1.pdf]

## Supplementary Material

### **A dynamic gas extraction-assisted paper-based method for colorimetric determination of bromides**

**Marina O. Gorbunova<sup>a,b</sup>, Maria S. Garshina<sup>a</sup>, Margarita S. Kulyaginova<sup>b</sup>,  
Vladimir V. Apyari<sup>c,\*</sup>, Aleksei A. Furletov<sup>c</sup>, Alexey V. Garshev<sup>c,d</sup>,  
Stanislava G. Dmitrienko<sup>c</sup>, Yury A. Zolotov<sup>c,e</sup>**

*<sup>a</sup>Southern Federal University, Department of Chemistry, Zorge st., 7, 344090 Rostov-on-Don, Russia*

*<sup>b</sup>Rostov State Medical University of the Ministry of Healthcare of Russian Federation, Pharmaceutical Faculty, Nakhichevansky lane, 29, 344022 Rostov-on-Don, Russia*

*<sup>c</sup>Department of Chemistry, Lomonosov Moscow State University, Leninskie gory, 1/3, 119991 Moscow, Russia*

*<sup>d</sup>Department of Materials Science, Lomonosov Moscow State University, Leninskie gory, 1/73, 119991 Moscow, Russia*

*<sup>e</sup>Kurnakov Institute of General and Inorganic Chemistry of the Russian Academy of Sciences, Leninsky Prospect, 31, 119991 Moscow, Russia*

---

\* Corresponding author: e-mail: [apyari@mail.ru](mailto:apyari@mail.ru)

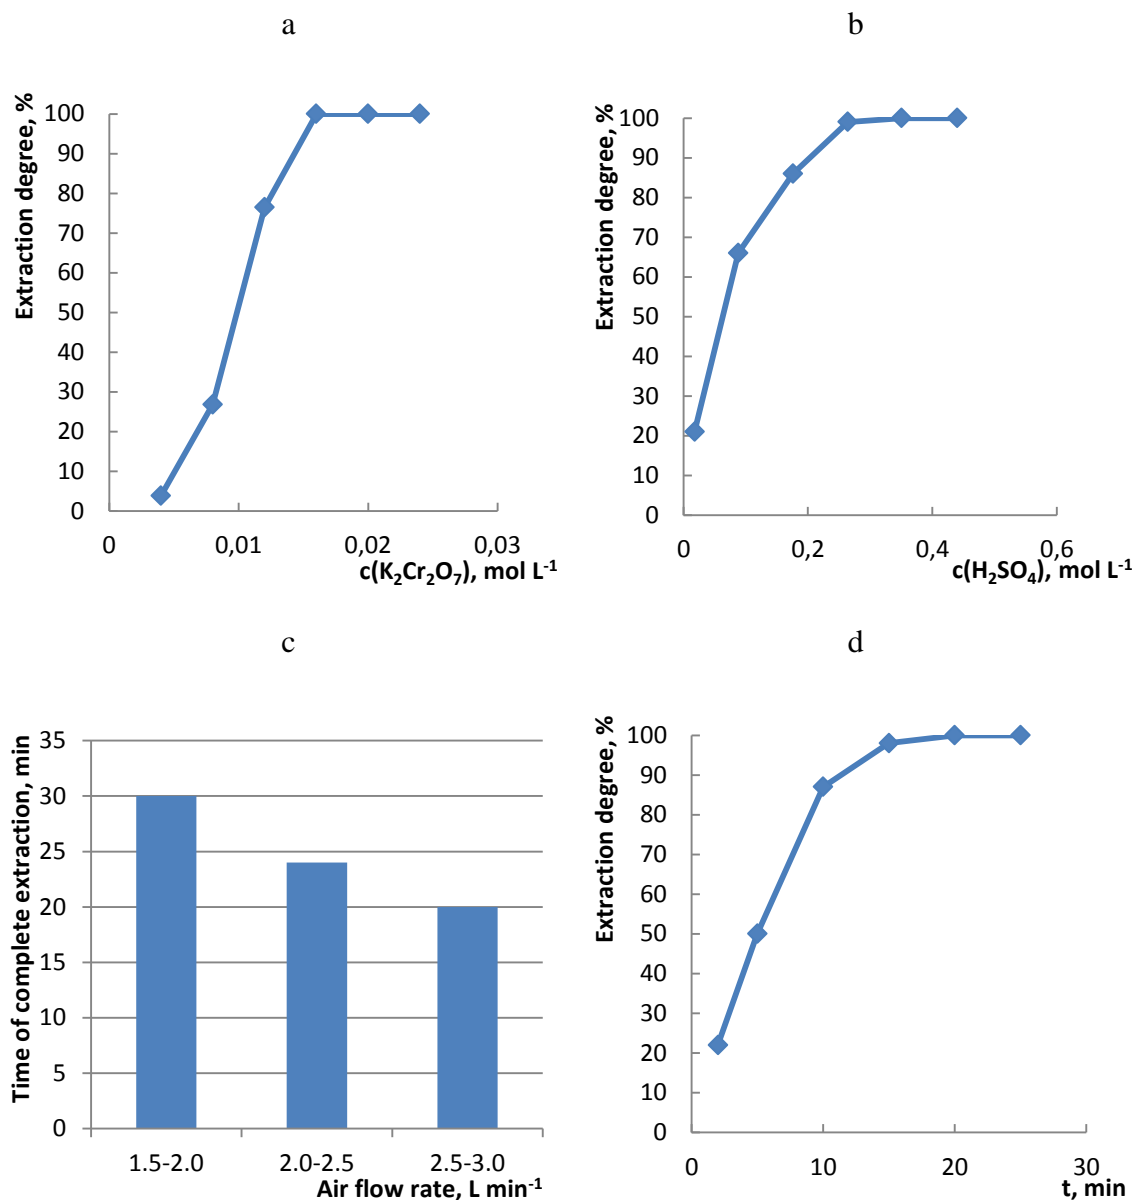

**Fig. S1.** Effects of (a) concentration of potassium dichromate, (b) concentration of sulfuric acid, (c) air flow rate, and (d) time of gas extraction on the determination of bromides. a)  $c(\text{Br}^-) = 2 \text{ mg L}^{-1}$ ,  $c(\text{H}_2\text{SO}_4) = 0.35 \text{ mol L}^{-1}$ , air flow rate =  $2.5\text{--}3.0 \text{ L min}^{-1}$ ,  $t = 20 \text{ min}$ ; b)  $c(\text{Br}^-) = 0.2 \text{ mg L}^{-1}$ ,  $c(\text{K}_2\text{Cr}_2\text{O}_7) = 0.02 \text{ mol L}^{-1}$ , air flow rate =  $2.5\text{--}3.0 \text{ L min}^{-1}$ ,  $t = 20 \text{ min}$ ; c)  $c(\text{Br}^-) = 0.2 \text{ mg L}^{-1}$ ,  $c(\text{K}_2\text{Cr}_2\text{O}_7) = 0.02 \text{ mol L}^{-1}$ ,  $c(\text{H}_2\text{SO}_4) = 0.35 \text{ mol L}^{-1}$ ; d)  $c(\text{Br}^-) = 0.2 \text{ mg L}^{-1}$ ,  $c(\text{K}_2\text{Cr}_2\text{O}_7) = 0.02 \text{ mol L}^{-1}$ ,  $c(\text{H}_2\text{SO}_4) = 0.35 \text{ mol L}^{-1}$ , air flow rate =  $2.5\text{--}3.0 \text{ L min}^{-1}$ .

**Table S1.** Parameters of exponential calibration curves, sensitivity coefficients ( $A/t$ ) and squared correlation coefficients ( $R^2$ ) for determination of bromides

| Parameter | Color coordinate |                 |                 |
|-----------|------------------|-----------------|-----------------|
|           | <i>R</i>         | <i>G</i>        | <i>B</i>        |
| $y_0$     | $162.9 \pm 1.1$  | $177.5 \pm 1.5$ | $213.4 \pm 1.1$ |
| <i>A</i>  | $77.7 \pm 1.4$   | $64.4 \pm 1.9$  | $31.8 \pm 1.4$  |
| <i>t</i>  | $0.45 \pm 0.02$  | $0.50 \pm 0.05$ | $0.55 \pm 0.08$ |
| $A/t$     | 173              | 129             | 59              |
| $R^2$     | 0.998            | 0.993           | 0.985           |

**Table S2.** Declared compositions of the pharmaceuticals analyzed in this study

| Pharmaceutical                                             | Declared composition                                                                                                                                                                                               |
|------------------------------------------------------------|--------------------------------------------------------------------------------------------------------------------------------------------------------------------------------------------------------------------|
| “Adonis-Brom”, OAO<br>Borisovskii ZMP, Belarus             | Adonis dry extract 69.07 mg, potassium bromide 250 mg, potato starch, sunflower oil, magnesium carbonate, talc, sugar, calcium stearate, silica, titanium dioxide, yellow wax, gelatin, paraffin, quinolone yellow |
| “Petrossinum”, syrup,<br>Dalkhimfarm, Russia               | liquid thyme extract 12 g, potassium bromide 1 g, sugar syrup 82 g, ethyl alcohol 80% 5 g                                                                                                                          |
| “Amtersol”, syrup,<br>Yaroslavskaya<br>farmfabrika, Russia | potassium bromide 1 g, sodium benzonate 1 g, ammonium chloride 0.2 g, thermopsis extract liquid (1:2) 0.2 g, licorice extract thick 0.6 g, ethyl alcohol 90% 10 g, sugar syrup 87 g                                |
